# Supplementary material
Source: publisher figshare collection journal article supplement (https://acs.figshare.com/ndownloader/files/13304171)
Supplement: Supplementary file 1 [file 13304171]

## **Supporting Information**

### **Polymeric Microcapsules with Sustainable Core and Hierarchical Shell toward Superhydrophobicity and Sunlight-Induced Self-Healing Performance**

Na Yang,<sup>a</sup> Zi-Sheng Wang,<sup>b</sup> Zhao-Yan Zhu,<sup>a</sup> Si-Chong Chen,<sup>a</sup> Gang Wu<sup>\*a</sup>

<sup>a</sup> National Engineering Laboratory of Eco-Friendly Polymeric Materials (Sichuan), State Key Laboratory of Polymer Materials Engineering, College of Chemistry, Sichuan University, Chengdu 610064, China

<sup>b</sup> College of Letters & Science, University of California Santa Barbara, Santa Barbara, California 93111, United States

\*Corresponding author. E-mail: gangwu@scu.edu.cn

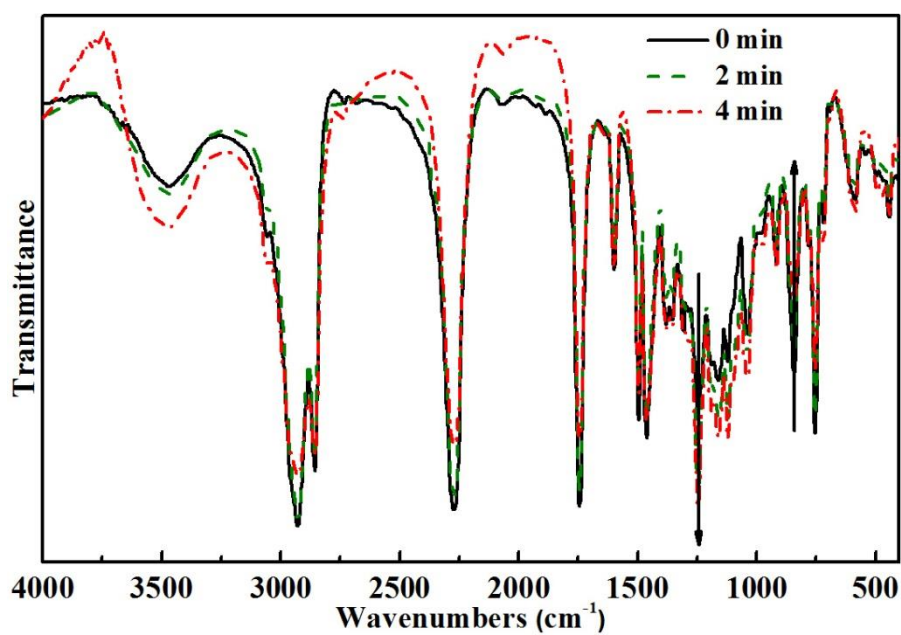

**Figure S1.** FTIR spectra of the core materials (ESO/CGE/HDI=6/3/1) after different sunlight exposure times in air.

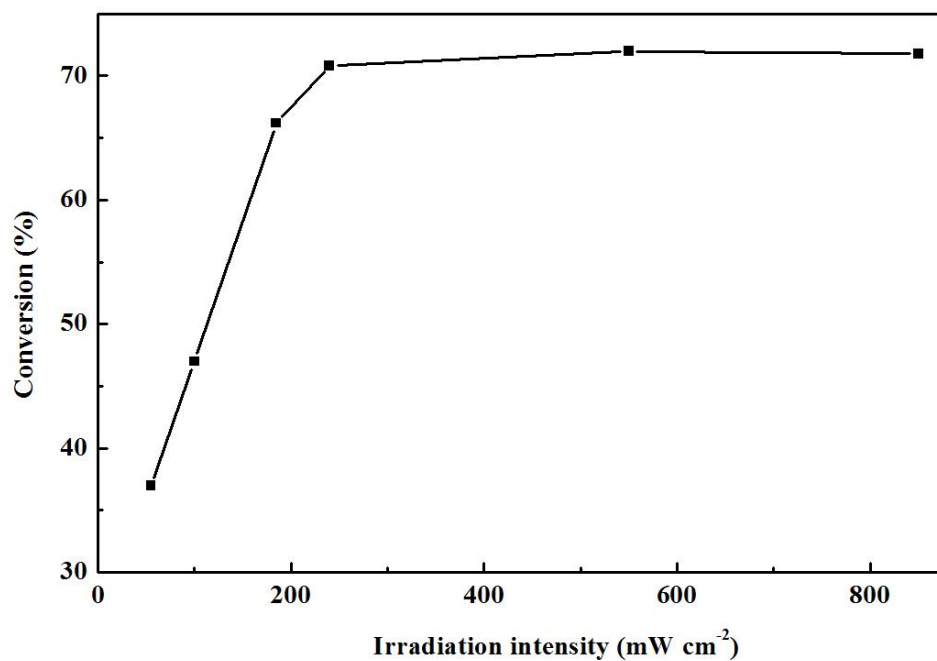

**Figure S2.** Curve of core materials conversion versus irradiation intensity of xenon lamp under a fixed irradiation time of 20 sec..

**Table S1.** The influence of light intensity on gel content (G) and degree of swelling (S)

of photopolymerized products.

| Light sources | Intensity (mW cm <sup>-2</sup> ) | G (%) | S (%) |
|---------------|----------------------------------|-------|-------|
| Sunlight      | 34.0-35.0                        | 67.2  | 262.3 |
|               | 6.7-7.3                          | 62.2  | 264.1 |
|               | 3.5-4.0                          | 52.4  | 339.2 |
| Xenon lamp    | 800.0                            | 66.5  | 197.9 |
|               | 350.0                            | 62.7  | 219.2 |
|               | 155.0                            | 60.6  | 220.4 |

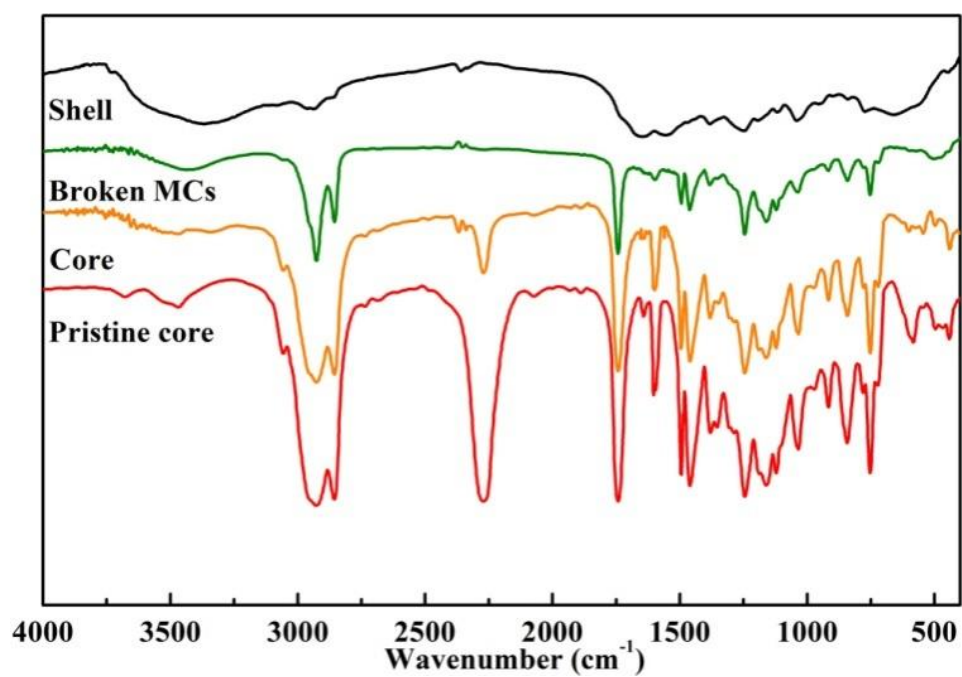

**Figure S3.** FTIR spectra of core, pristine core, broken microcapsules and shell.

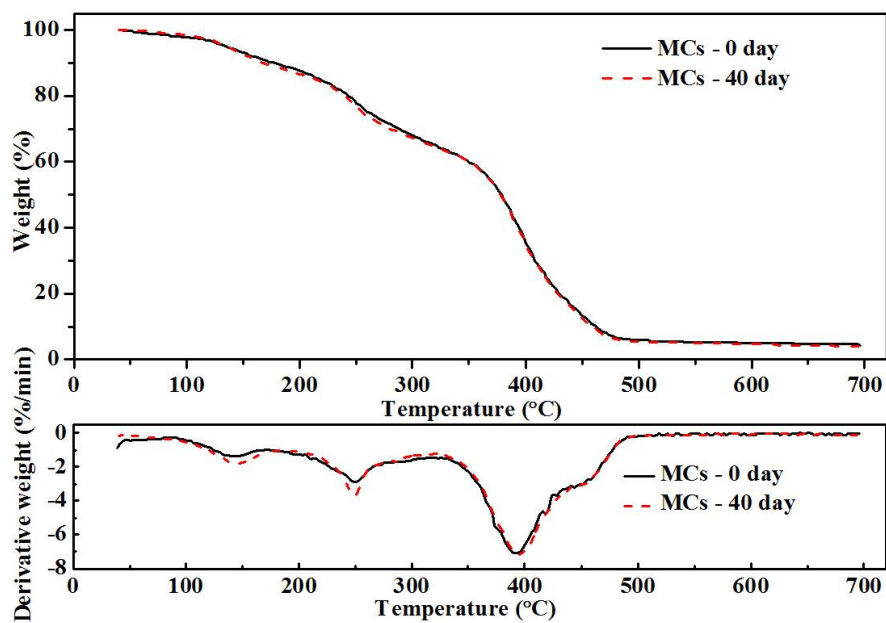

**Figure S4.** TGA curves of initial MCs (MCs-0 day) and MCs after 40 days storage (MCs-40 day).

**Table S2.** The influence of treating conditions on the core content of MCs-2.

| Sample             | Treating condition                | Core content (%) |
|--------------------|-----------------------------------|------------------|
| pristine MCs-2     | ambient temperature/0 day         | 64.7             |
| aging MCs-2        | ambient temperature/6 months      | 63.6             |
| Irradiated-MCs-2   | xenon lamp irradiation/20 minutes | 61.5             |
| Water-soaked-MCs-2 | water immersion/4 hours           | 62.9             |

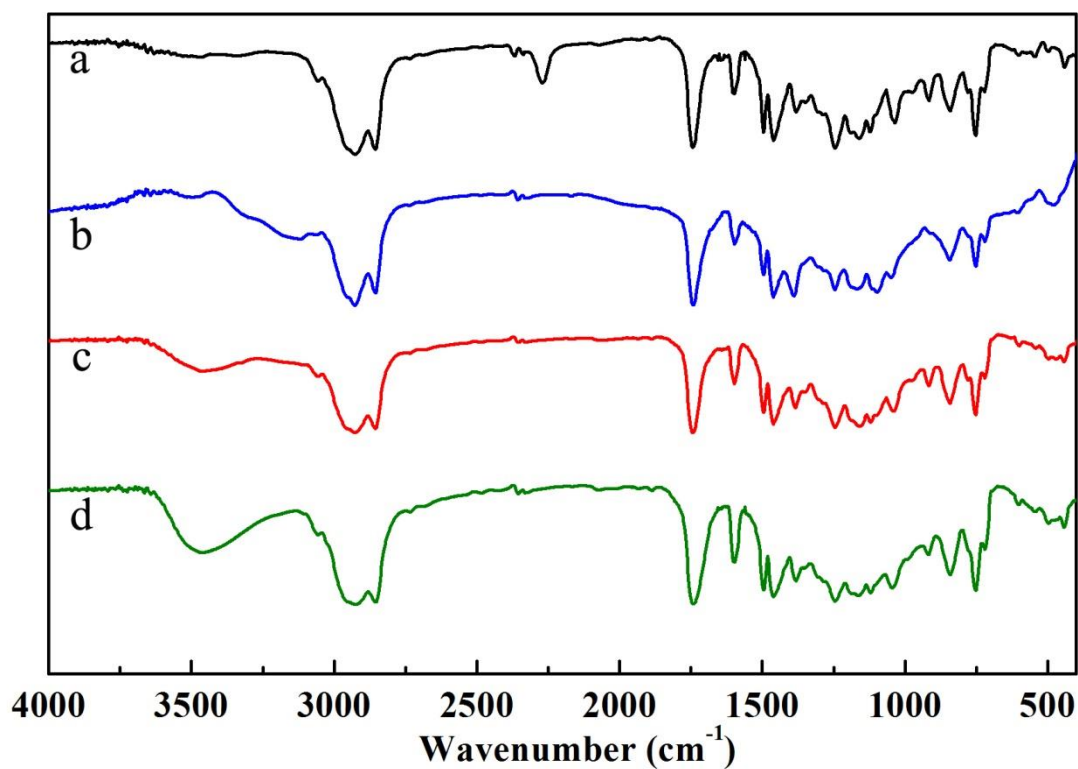

**Figure S5.** FTIR spectra of core materials of ruptured MCs that were (a) original state; (b) kept at ambient temperature for 6 months; (c) irradiated with a xenon lamp for 20 min; and (d) kept in water for 4 hours.



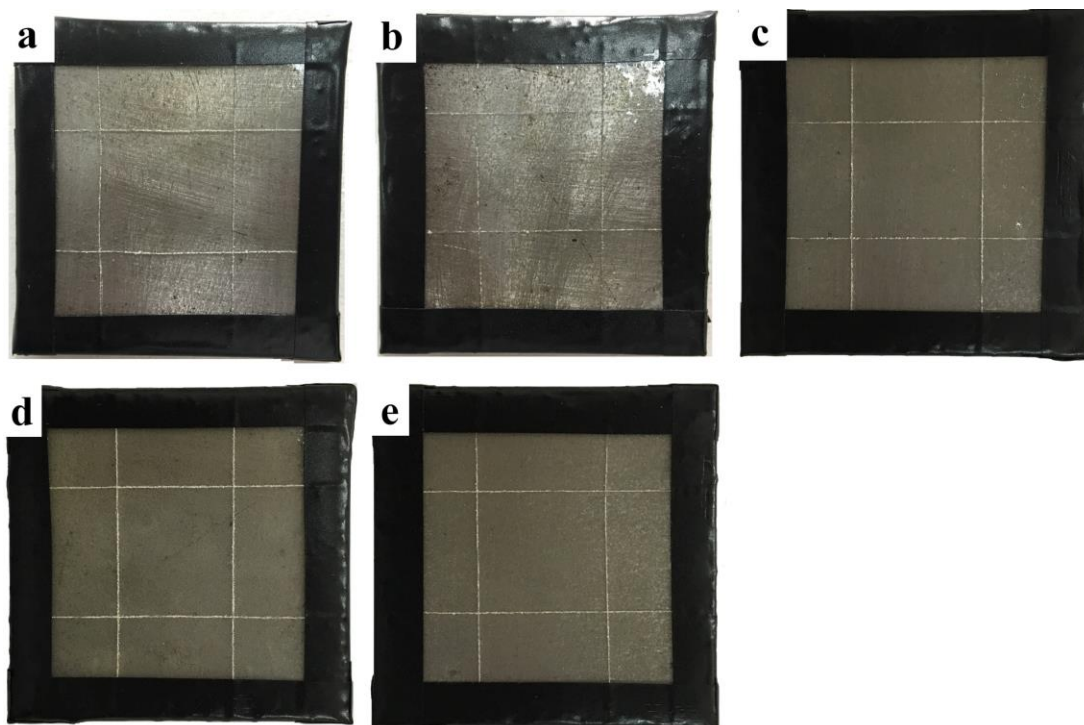

**Figure S6.** Photos of various coatings before immersion: (a) with 5 wt% of MCs-3, (b) with 10 wt% of MCs-3, (c) with 15 wt% of MCs-3, (d) with 15 wt% of MCs-1, and (e) with 15 wt% of MCs-2, respectively.

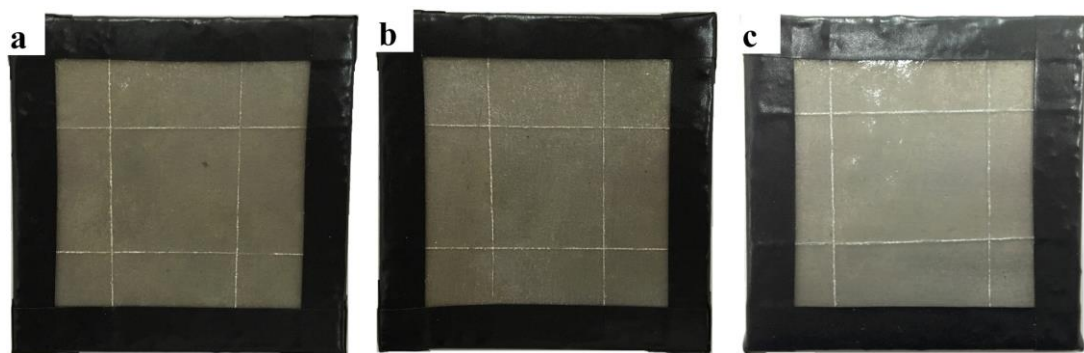

**Figure S7.** Photos of various coatings before immersion: (a) irradiated-MCs-3, (b) water-soaked-MCs-3, (c) irradiated-unbroken-coatings, respectively.

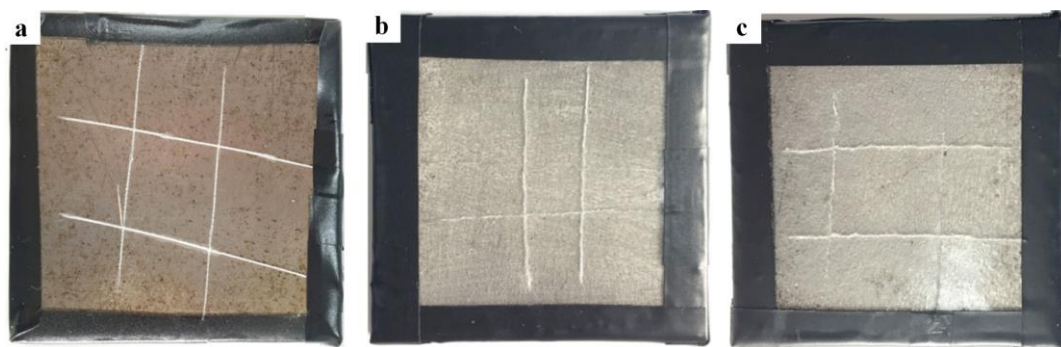

**Figure S8.** Photos of various coatings before immersion: (a) control specimen, (b) specimen with 10 wt% MCs-3, (c) specimen with 15 wt% MCs-3, respectively.

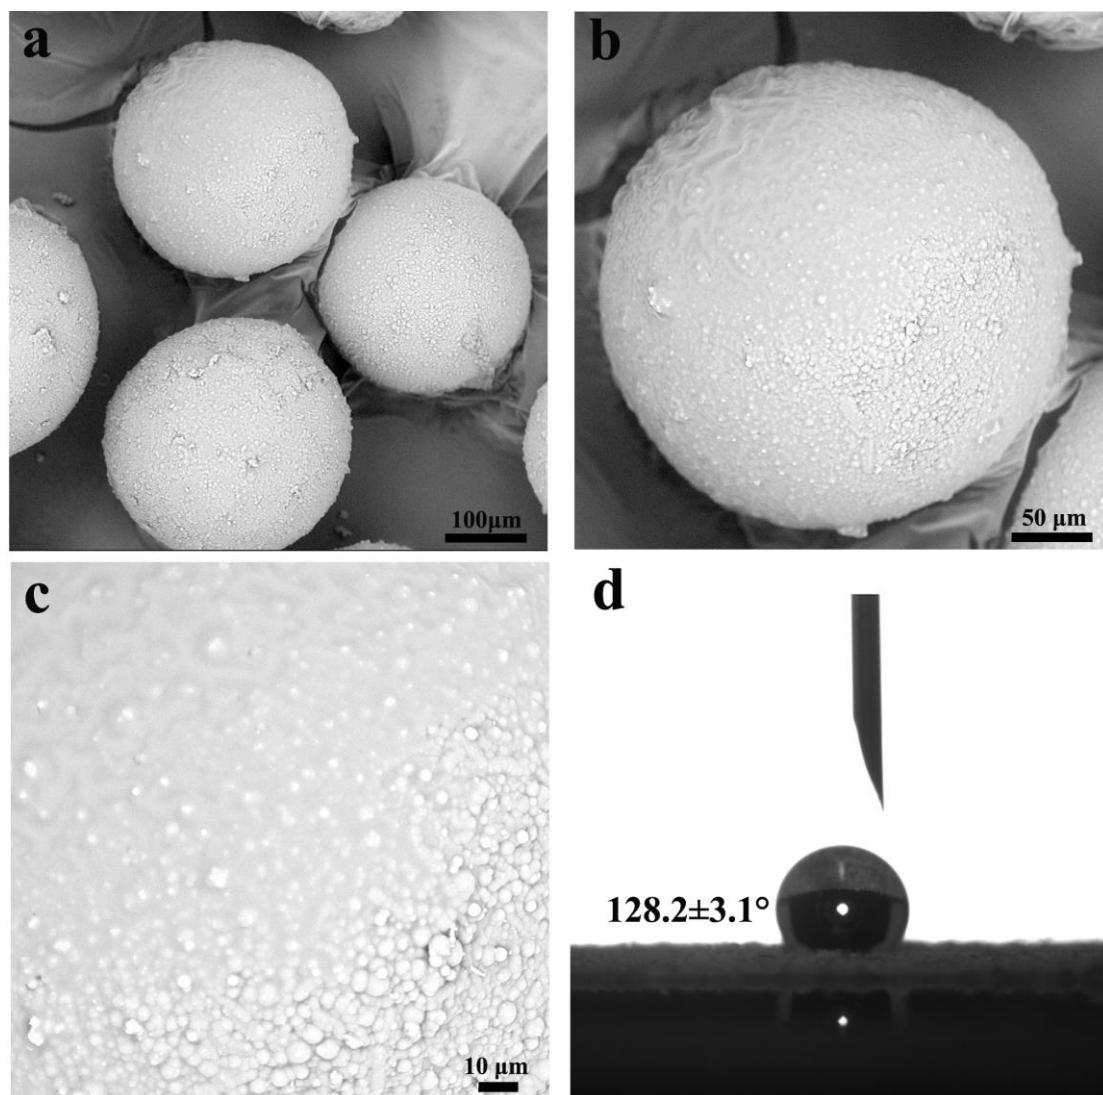

**Figure S9.** (a-c) SEM images of the microcapsules without hierarchical structure on the shell surface. (d) CA photo of water droplet on the surface of microcapsules.

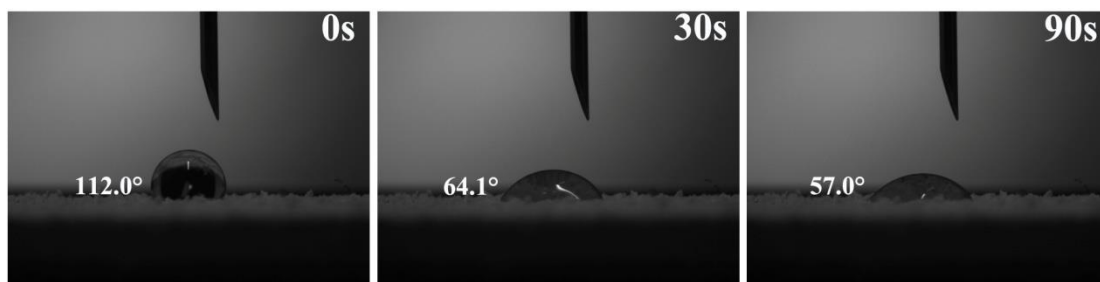

**Figure S10.** Contact angle (CA) photos of water droplet on the surface of the microcapsules only containing ESO and CGE (without HDI).

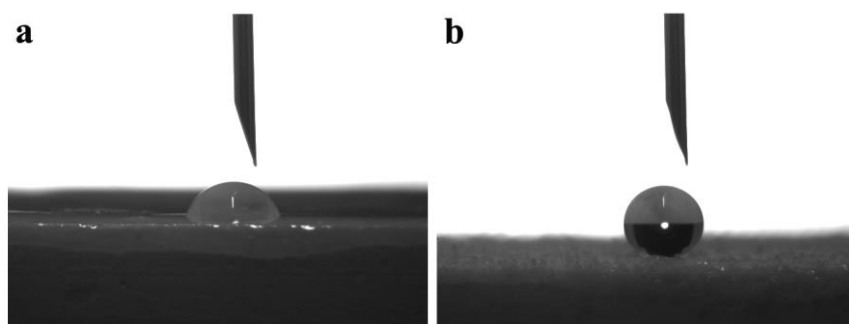

**Figure S11.** CA photos of water droplet on (a) pure epoxy coating and (b) MCs-3-bound epoxy coating.
